# Supplementary material for: Value-based evaluation of gestational diabetes mellitus care pathway redesign by using cost and outcome data
Source: Springer Nature journal article supplement (doi:10.1186/s12884-025-07576-2), 2025-05-26
Supplement: MOESM1 [file 12884_2025_7576_MOESM1_ESM.pdf]

|                       |                                                                                                                               | Pre-Intervention |      |      | Post-intervention |      |      |      |                 |           |
|-----------------------|-------------------------------------------------------------------------------------------------------------------------------|------------------|------|------|-------------------|------|------|------|-----------------|-----------|
| Domains               | Items per domain                                                                                                              | N                | M    | SD   | N                 | M    | SD   | p    | Mean Difference | Cohen's D |
| Respect               | Did your healthcare professionals treat you with respect?                                                                     | 100              | 3,87 | 0,37 | 137               | 3,92 | 0,27 | .254 | 0,050           | 0,2       |
|                       | Did your healthcare professionals treat you kindly?                                                                           | 100              | 3,80 | 0,45 | 137               | 3,85 | 0,40 | .400 | 0,047           | 0,1       |
|                       | Did you feel that you could tell your healthcare professionals everything?                                                    | 100              | 3,56 | 0,72 | 137               | 3,67 | 0,56 | .196 | 0,112           | 0,2       |
|                       | Did you receive personal attention from your healthcare professionals?                                                        | 100              | 3,51 | 0,69 | 137               | 3,74 | 0,51 | .005 | 0,235           | 0,4       |
|                       | Did your healthcare professionals take your wishes and customs regarding pregnancy into account?                              | 100              | 3,64 | 0,63 | 137               | 3,71 | 0,58 | .392 | 0,068           | 0,1       |
| Autonomy              | Did you participate in deciding on your treatment for gestational diabetes if possible?                                       | 100              | 2,91 | 1,10 | 137               | 3,16 | 0,96 | .064 | 0,251           | 0,2       |
|                       | Were you sufficiently involved in discussing blood sugar values?                                                              | 100              | 3,21 | 1,04 | 137               | 3,52 | 0,75 | .012 | 0,308           | 0,3       |
|                       | Were you able to refuse a proposed treatment for your gestational diabetes?                                                   | 100              | 2,47 | 1,20 | 137               | 2,88 | 1,16 | .008 | 0,413           | 0,3       |
| Confidentiality       | Did your healthcare professionals take your privacy into account?                                                             | 100              | 3,83 | 0,43 | 137               | 3,93 | 0,28 | .034 | 0,104           | 0,3       |
|                       | Did your healthcare professionals handle your medical information and records carefully?                                      | 100              | 3,81 | 0,42 | 137               | 3,93 | 0,25 | .009 | 0,124           | 0,4       |
| Communication         | Could you discuss important matters with your healthcare professionals without others hearing?                                | 100              | 3,85 | 0,44 | 137               | 3,92 | 0,27 | .160 | 0,070           | 0,2       |
|                       | Did your healthcare professionals answer your questions about gestational diabetes?                                           | 100              | 3,65 | 0,61 | 137               | 3,73 | 0,49 | .282 | 0,080           | 0,1       |
|                       | Did you understand the explanation from your dietitian?                                                                       | 100              | 3,83 | 0,43 | 137               | 3,75 | 0,54 | .215 | -0,078          | -0,2      |
|                       | Did you understand the explanation from your healthcare professional about gestational diabetes?                              | 100              | 3,69 | 0,56 | 137               | 3,71 | 0,54 | .804 | 0,018           | 0,0       |
|                       | Did you understand the explanation from your healthcare professionals about monitoring blood sugars?                          | 100              | 3,74 | 0,56 | 137               | 3,72 | 0,58 | .744 | -0,025          | 0,0       |
|                       | Did your healthcare professionals give the same advice?                                                                       | 100              | 3,35 | 0,80 | 137               | 3,34 | 0,78 | .891 | -0,014          | 0,0       |
|                       | Did your healthcare professional have enough time to explain the different treatment options?                                 | 100              | 3,40 | 0,95 | 137               | 3,45 | 0,82 | .696 | 0,045           | 0,1       |
|                       | Did your healthcare professional tell you what to do if your blood sugar was too high or too low?                             | 100              | 3,57 | 0,81 | 137               | 3,43 | 0,85 | .203 | -0,139          | -0,2      |
| Information           | How did you find the clarity of the written information (information leaflet) about gestational diabetes?                     | 95               | 4,08 | 0,66 | 129               | 4,15 | 0,66 | .482 | 0,063           | 0,1       |
|                       | How did you find the clarity of the animation about gestational diabetes?                                                     | 50               | 3,90 | 0,65 | 86                | 4,12 | 0,60 | .052 | 0,216           | 0,3       |
|                       | How did you find the user-friendliness of the app for tracking your blood sugar values?                                       | 23               | 4,17 | 0,65 | 109               | 4,30 | 0,73 | .433 | 0,129           | 0,2       |
| Prompt attention      | Did your healthcare professionals have time for you if you asked for it?                                                      | 100              | 3,48 | 0,70 | 137               | 3,64 | 0,55 | .057 | 0,162           | 0,3       |
|                       | Could you quickly make an appointment if it was urgent?                                                                       | 100              | 3,34 | 0,81 | 137               | 3,64 | 0,63 | .002 | 0,302           | 0,4       |
|                       | Could you easily make an appointment if it was not urgent?                                                                    | 100              | 3,29 | 0,83 | 137               | 3,53 | 0,62 | .015 | 0,243           | 0,3       |
|                       | Were you quickly seen at your appointment?                                                                                    | 100              | 3,26 | 0,79 | 137               | 3,47 | 0,65 | .023 | 0,214           | 0,3       |
|                       | Was your dietitian easily accessible?                                                                                         | 96               | 3,63 | 0,58 | 130               | 3,52 | 0,74 | .249 | -0,102          | -0,2      |
| Social consideration  | Was your healthcare professional for gestational diabetes easily accessible?                                                  | 100              | 3,38 | 0,79 | 137               | 3,63 | 0,64 | .011 | 0,248           | 0,3       |
|                       | Did your healthcare professionals take your situation into account, such as your family, work, and daily activities?          | 100              | 2,71 | 0,98 | 137               | 3,11 | 0,98 | .002 | 0,399           | 0,4       |
|                       | Did you feel supported by your partner, family, or others?                                                                    | 100              | 3,61 | 0,63 | 137               | 3,64 | 0,62 | .761 | 0,025           | 0,0       |
|                       | Were your partner or family involved in the care for your gestational diabetes?                                               | 100              | 1,55 | 0,97 | 137               | 2,34 | 1,26 | .000 | 0,793           | 0,7       |
| Basic amenities       | Were the waiting room and consultation room in the midwifery practice comfortable?                                            | 84               | 4,36 | 0,63 | 131               | 4,43 | 0,66 | .438 | 0,070           | 0,1       |
|                       | Were the waiting room and consultation room in the hospital comfortable?                                                      | 78               | 4,01 | 0,75 | 110               | 4,13 | 0,83 | .331 | 0,114           | 0,1       |
|                       | How did you find the availability of glucose strips and glucose meters?                                                       | 100              | 4,06 | 0,85 | 137               | 4,14 | 0,91 | .500 | 0,079           | 0,1       |
| Choice and continuity | Did your healthcare professionals give the same advice about your gestational diabetes?                                       | 100              | 3,38 | 0,74 | 137               | 3,40 | 0,76 | .828 | 0,021           | 0,0       |
|                       | When there was a change of healthcare professionals, was your new healthcare professional well informed about your situation? | 100              | 3,31 | 0,90 | 137               | 3,43 | 0,81 | .280 | 0,121           | 0,1       |
|                       | Was it always clear who was in charge of the care you received for gestational diabetes?                                      | 100              | 2,67 | 1,15 | 137               | 3,23 | 1,00 | .000 | 0,556           | 0,5       |
|                       | Was your health and that of your baby monitored?                                                                              | 100              | 3,38 | 0,94 | 137               | 3,58 | 0,70 | .069 | 0,204           | 0,2       |
